# Supplementary material for: Interaction of l-alanyl-l-valine and l-valyl-l-alanine with organic vapors: thermal stability of clathrates, sorption capacity and the change in the morphology of dipeptide films
Source: Royal Society of Chemistry journal article supplement (doi:10.1039/c5cp03309h), 2015-01-01
Supplement: c5cp03309h1.pdf [file c5cp03309h1.pdf]

## Electronic Supplementary Information

### **Interaction of L-alanyl-L-valine and L-valyl-L-alanine with organic vapors: thermal stability of clathrates, sorption capacity and change of morphology of dipeptide films**

Marat A. Ziganshin,<sup>a,\*</sup> Nadezhda S. Gubina,<sup>a</sup> Alexander V. Gerasimov,<sup>a</sup> Valery V. Gorbatchuk,<sup>a</sup> Sufia A. Ziganshina,<sup>b</sup> Anton P. Chuklanov<sup>b</sup> and Anastas A. Bukharaev<sup>b</sup>

<sup>a</sup> *A.M. Butlerov Institute of Chemistry, Kazan Federal University,*

*Kremlevskaya 18, Kazan, 420008 Russia, E-mail: Marat.Ziganshin@kpfu.ru*

<sup>b</sup> *Kazan Zavoisky Physical-Technical Institute of the Kazan Scientific Center of the Russian Academy of Sciences, Sibirskii trakt 10/7, Kazan, 420029 Russia*

QCM data for successive sensor experiments; TG/DSC/MS data for the studied dipeptides and products of their saturation with guest vapors; AFM images of the surface of thin film of dipeptide saturated with vapors.

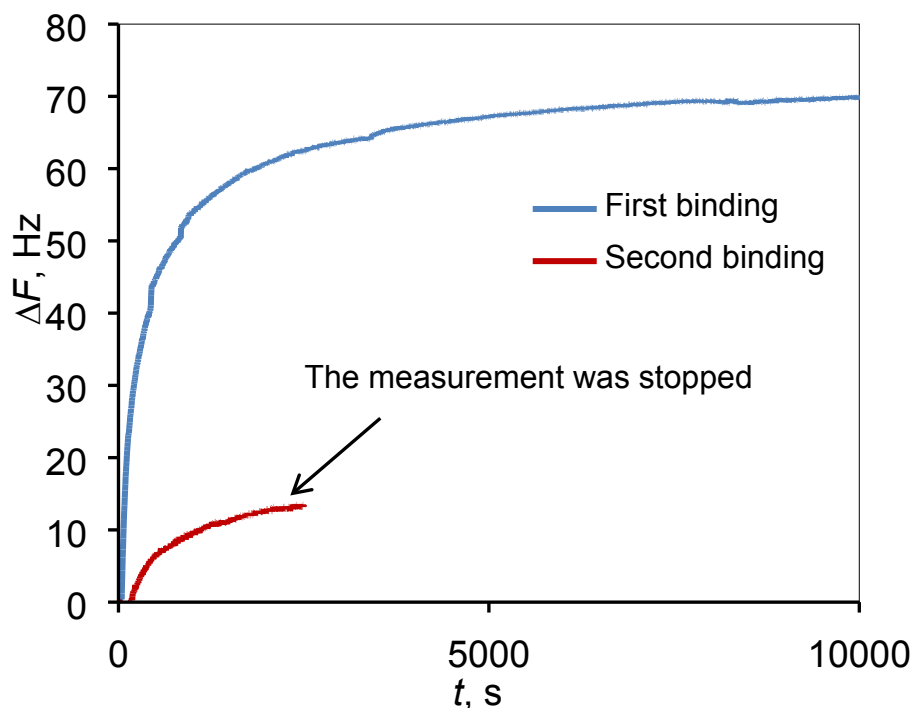

Figure 1S – The successive responses of QCM sensor coated with dipeptide **AV** to vapor of carbon tetrachloride. Before the second binding sensors were dried for 2 min by hot air (45°C).

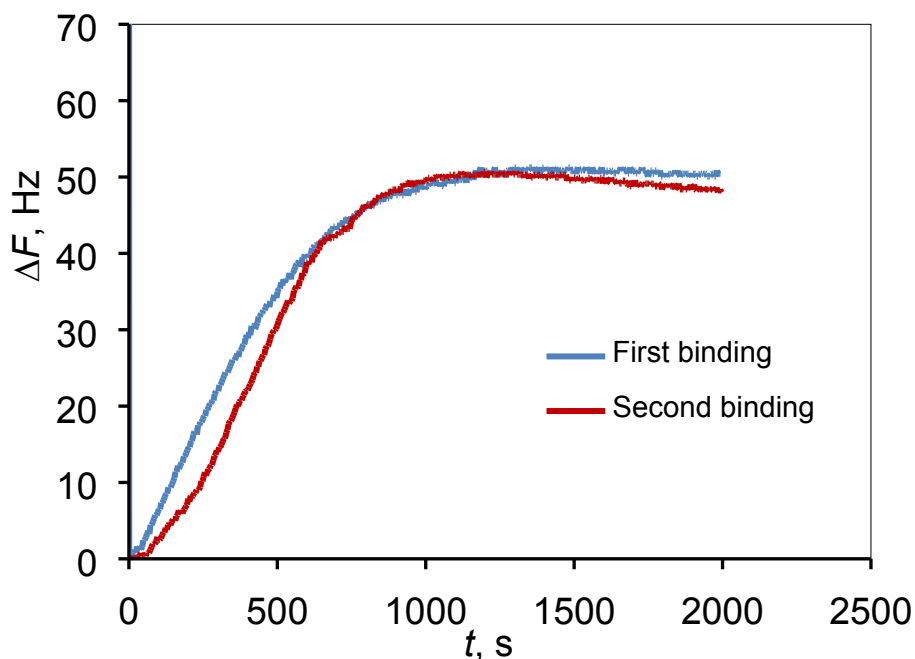

Figure 2S – The successive responses of QCM sensor coated with dipeptide **AV** to vapor of water. Before the second binding sensors were dried for 2 min by hot air (45°C).

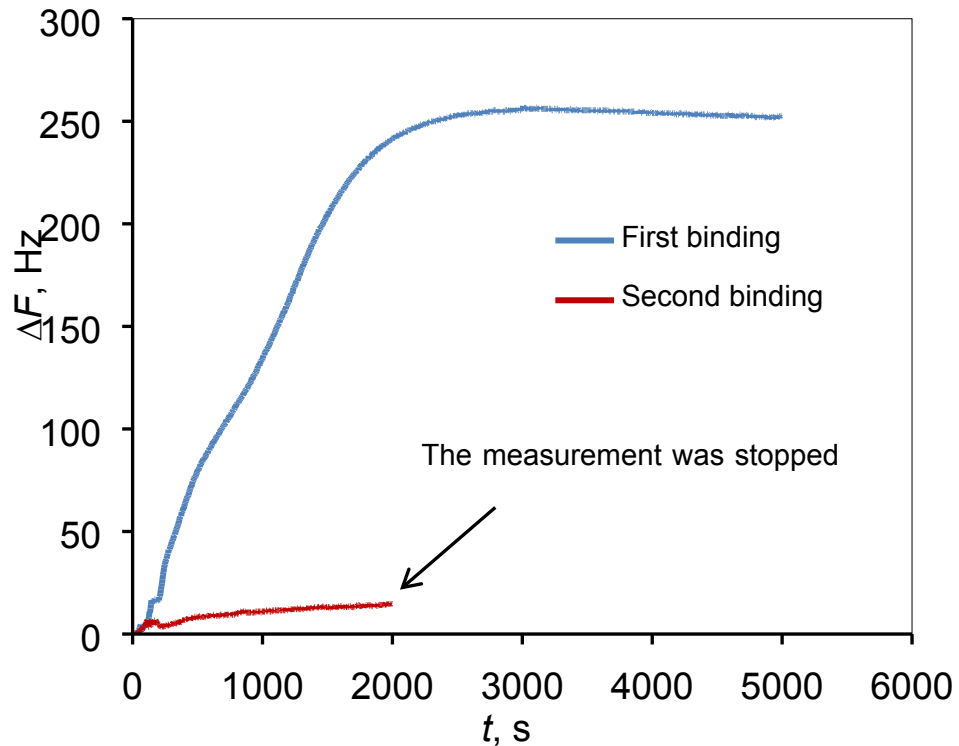

Figure 3S – The successive responses of QCM sensor coated with dipeptide **VA** to vapor of pyridine. Before the second binding sensors were dried for 2 min by hot air (45°C).

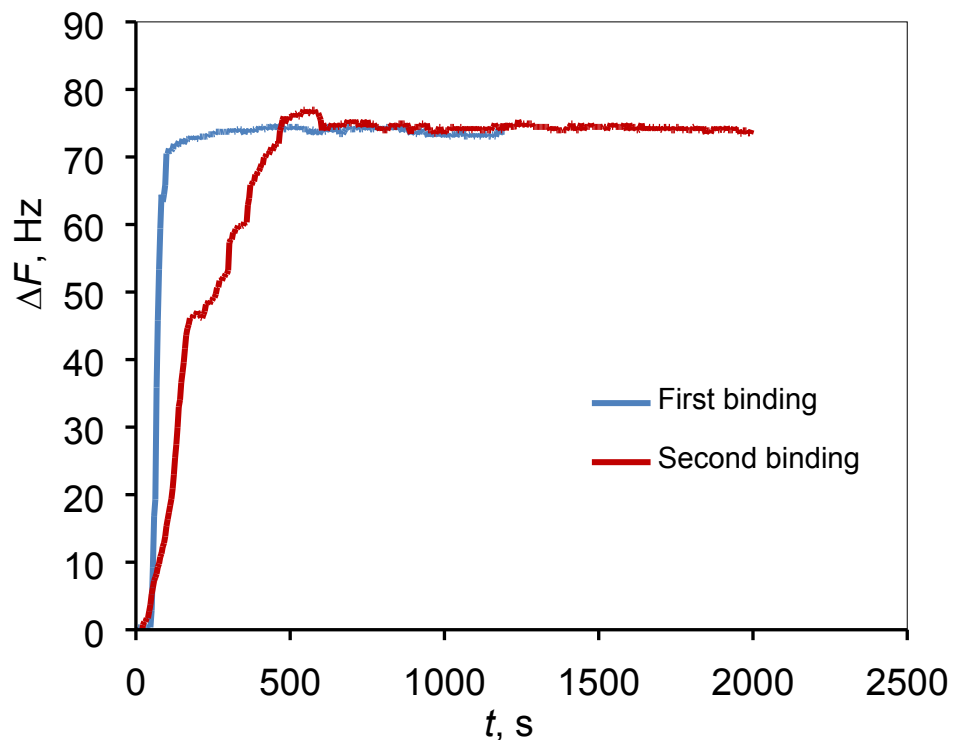

Figure 4S – The successive responses of QCM sensor coated with dipeptide **VA** to vapor of ethanol. Before the second binding sensors were dried for 2 min by hot air (45°C).

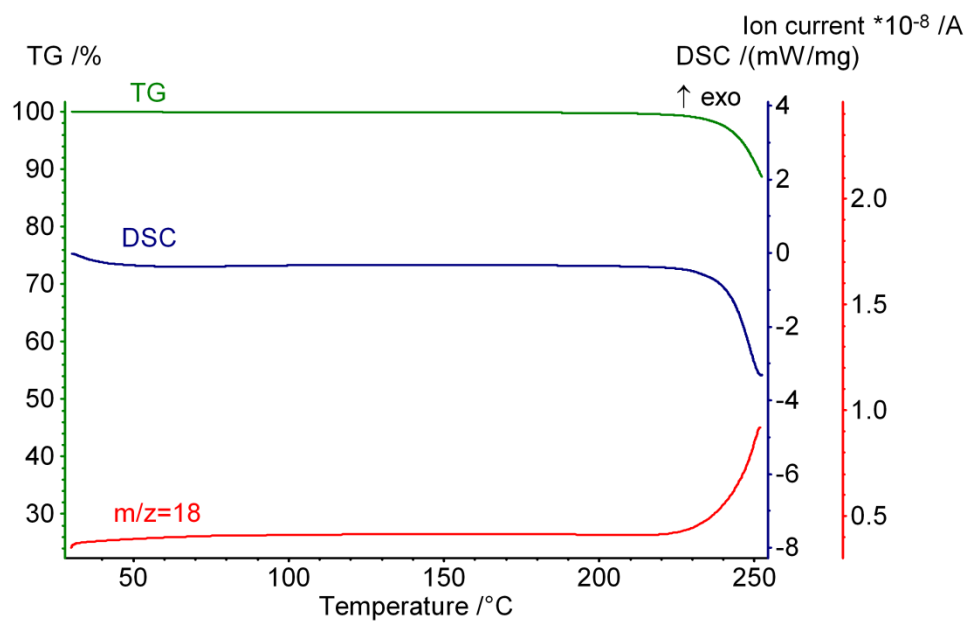

Figure 5S – The data of TG/DSC/MS analysis for dipeptide AV.

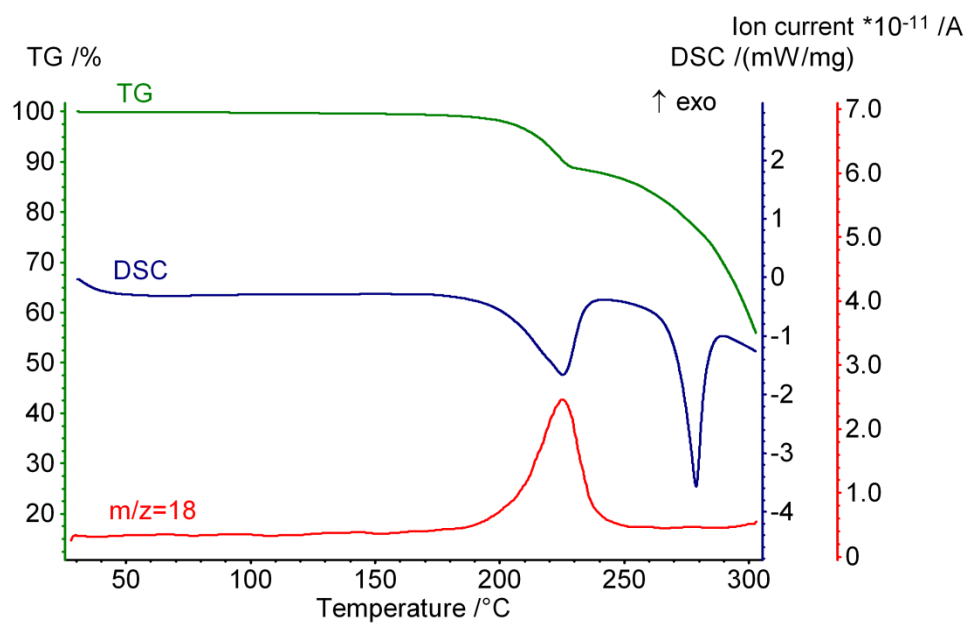

Figure 6S – The data of TG/DSC/MS analysis for dipeptide VA.

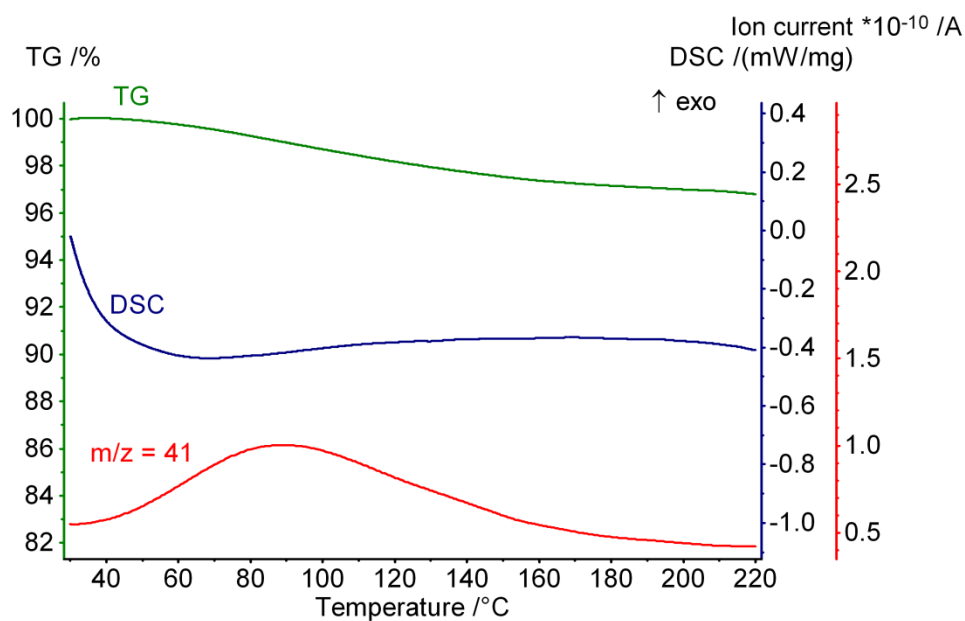

Figure 7S – The data of TG/DSC/MS analysis for product of AV saturation with vapor of acetonitrile. Ion thermogram of CH<sub>3</sub>CN (m/z=41) is shown. Heating rate is 10 K/min.

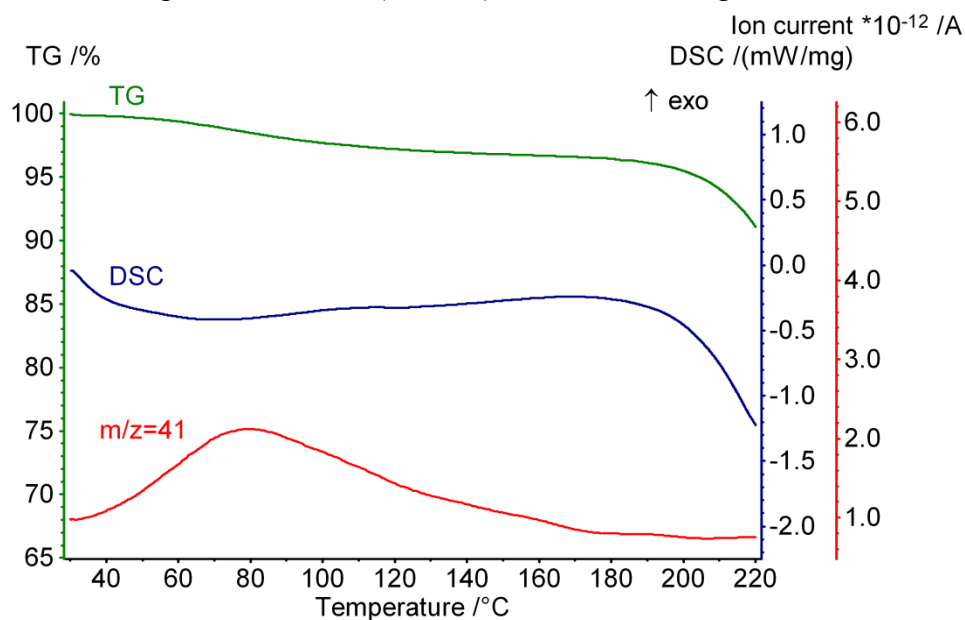

Figure 8S. The data of TG/DSC/MS analysis for product of VA saturation with vapor of acetonitrile. Ion thermogram of CH<sub>3</sub>CN (m/z=41) is shown. Heating rate is 10 K/min.

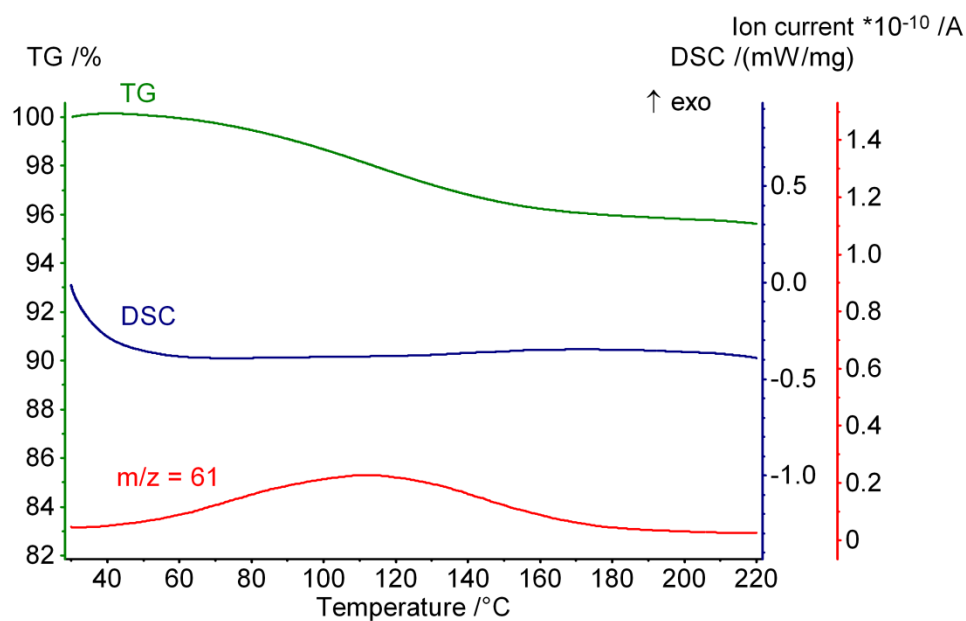

Figure 9S – The data of TG/DSC/MS analysis for product of AV saturation with vapor of nitromethane. Ion thermogram of  $\text{CH}_3\text{NO}_2$  ( $m/z=61$ ) is shown. Heating rate is 10 K/min.

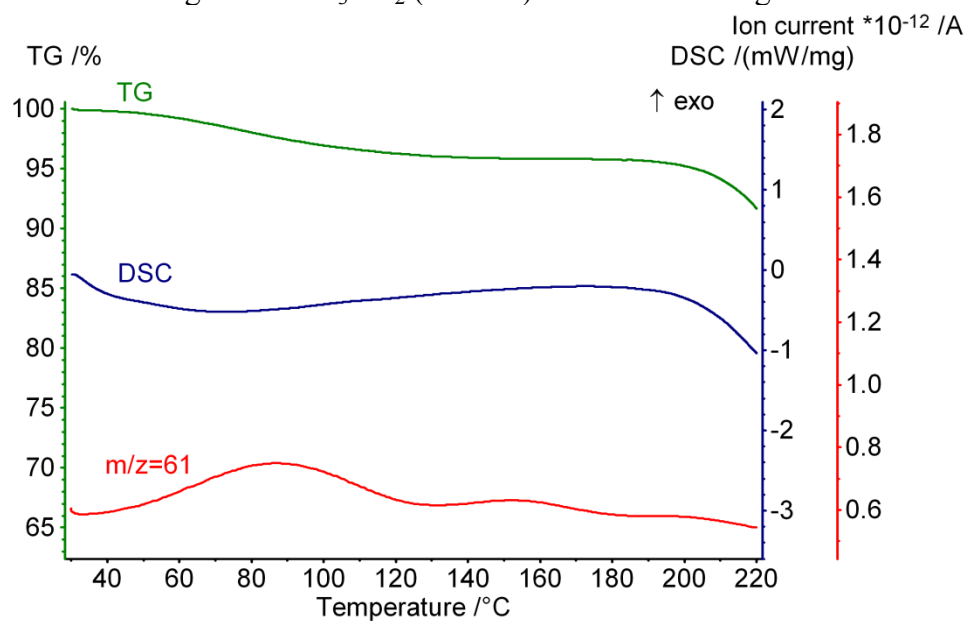

Figure 10S – The data of TG/DSC/MS analysis for product of VA saturation with vapor of nitromethane. Ion thermogram of  $\text{CH}_3\text{NO}_2$  ( $m/z=61$ ) is shown. Heating rate is 10 K/min.

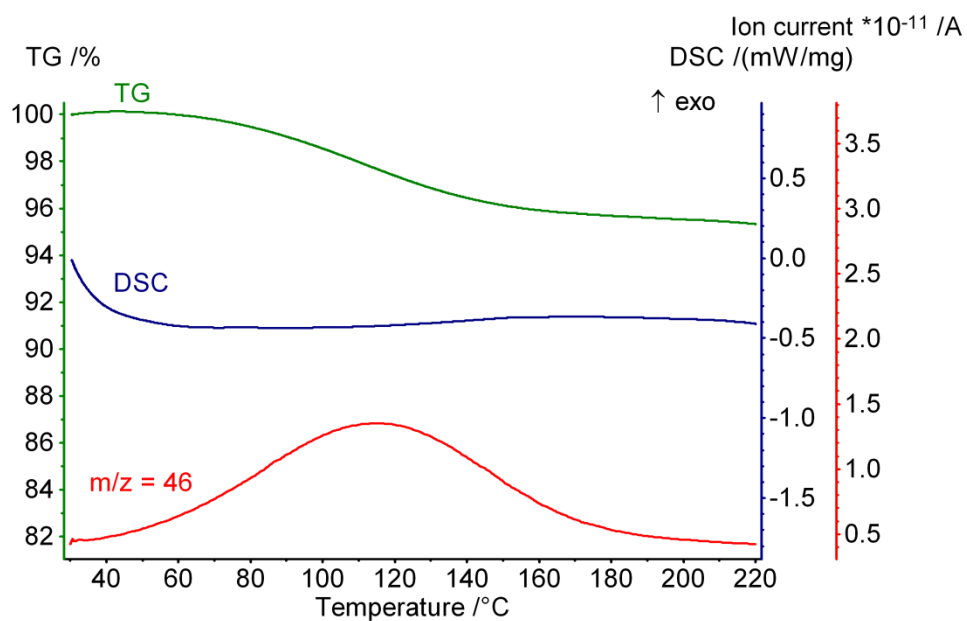

Figure 11S – The data of TG/DSC/MS analysis for product of AV saturation with vapor of ethanol. Ion thermogram of C<sub>2</sub>H<sub>5</sub>OH (m/z=46) is shown. Heating rate is 10 K/min.

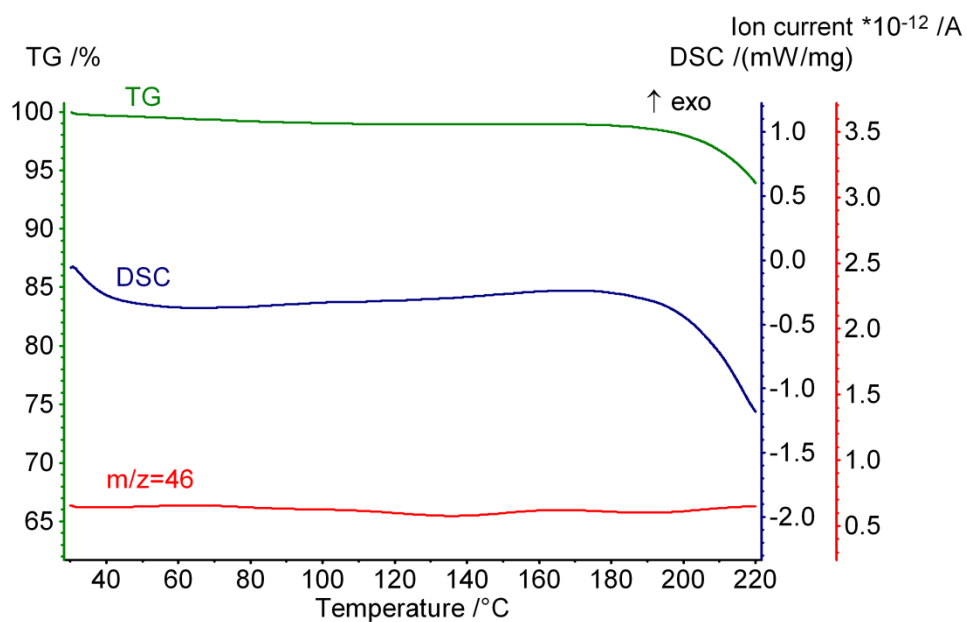

Figure 12S – The data of TG/DSC/MS analysis for product of VA saturation with vapor of ethanol. Ion thermogram of C<sub>2</sub>H<sub>5</sub>OH (m/z=46) is shown. Heating rate is 10 K/min.

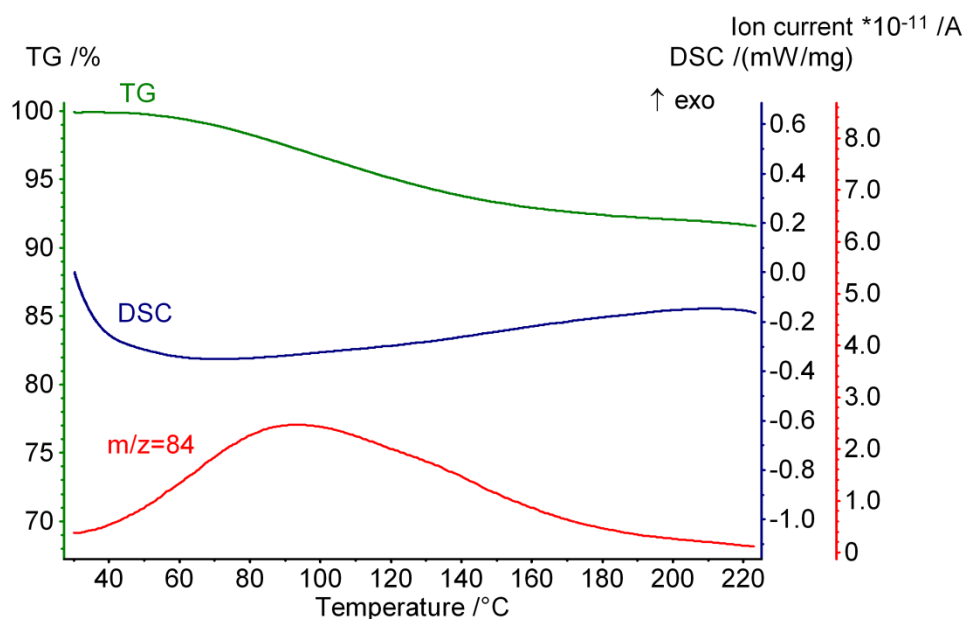

Figure 13S – The data of TG/DSC/MS analysis for product of AV saturation with vapor of methylene chloride. Ion thermogram of CH<sub>2</sub>Cl<sub>2</sub> (m/z=84) is shown. Heating rate is 10 K/min.

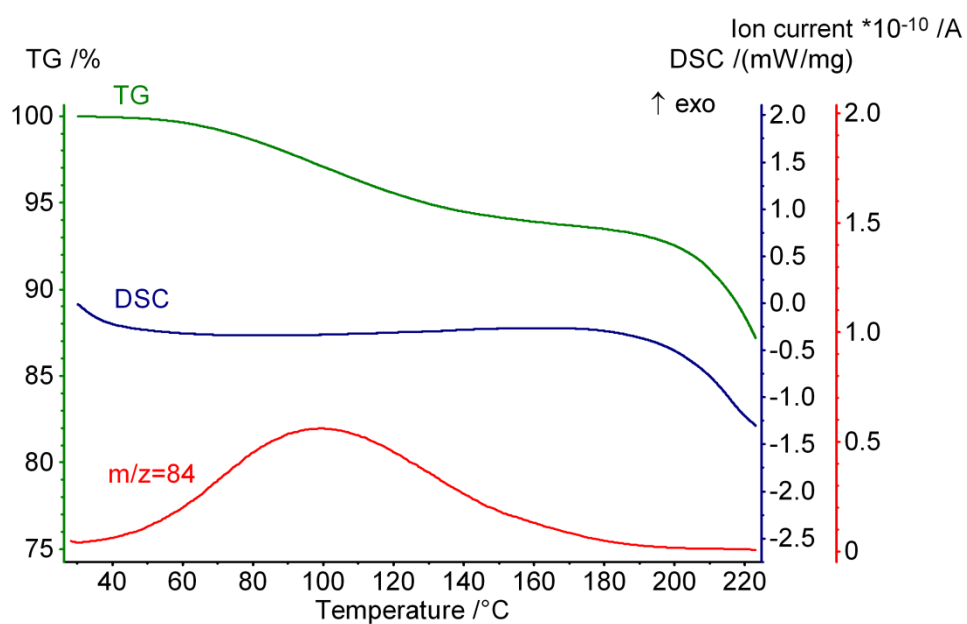

Figure 14S – The data of TG/DSC/MS analysis for product of VA saturation with vapor of methylene chloride. Ion thermogram of CH<sub>2</sub>Cl<sub>2</sub> (m/z=84) is shown. Heating rate is 10 K/min.



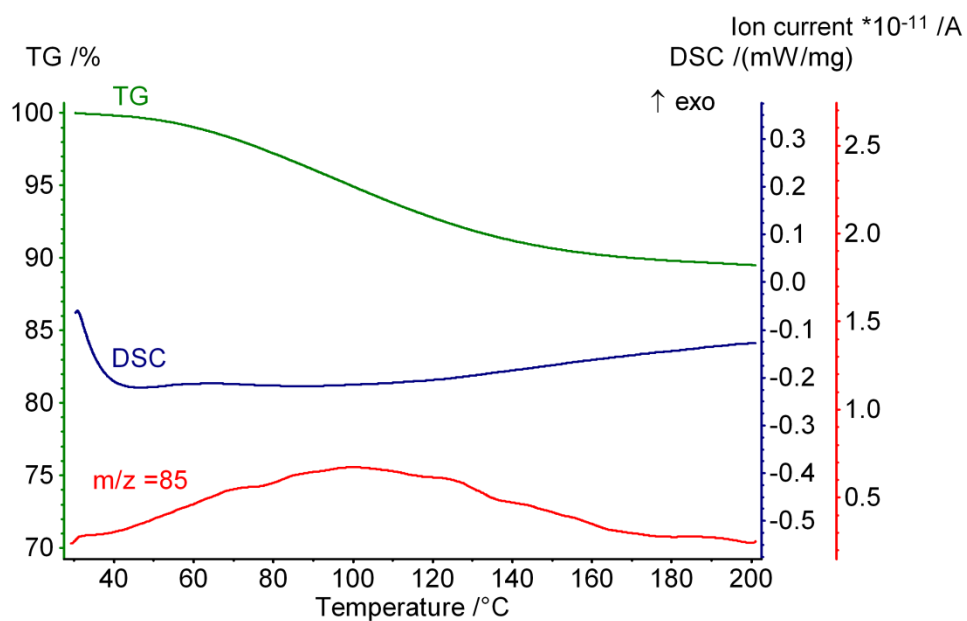

Figure 15S – The data of TG/DSC/MS analysis for product of VA saturation with vapor of chloroform. Ion thermogram of CHCl<sub>3</sub> (m/z=85) is shown. Heating rate is 10 K/min.

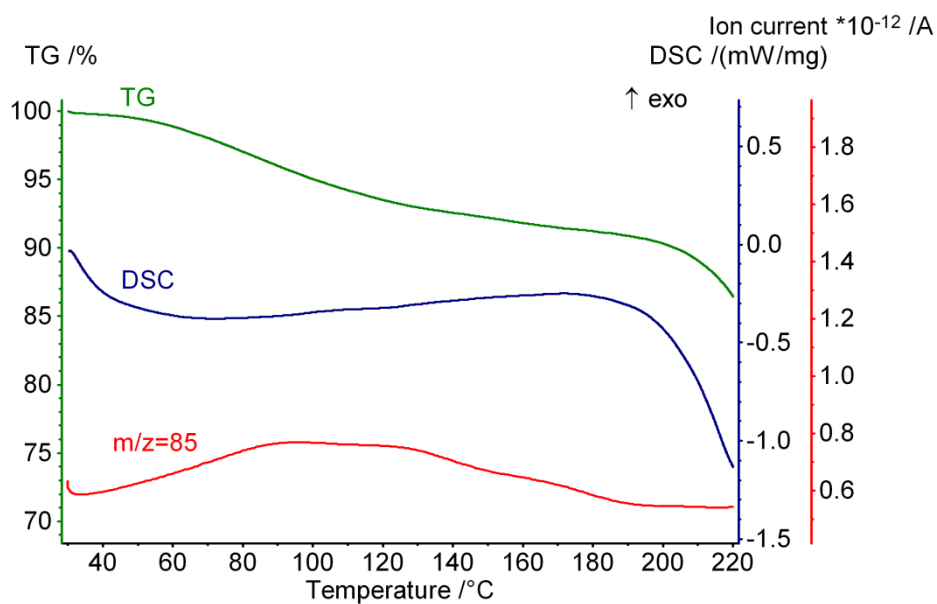

Figure 16S – The data of TG/DSC/MS analysis for product of AV saturation with vapor of chloroform. Ion thermogram of CHCl<sub>3</sub> (m/z=85) is shown. Heating rate is 10 K/min.

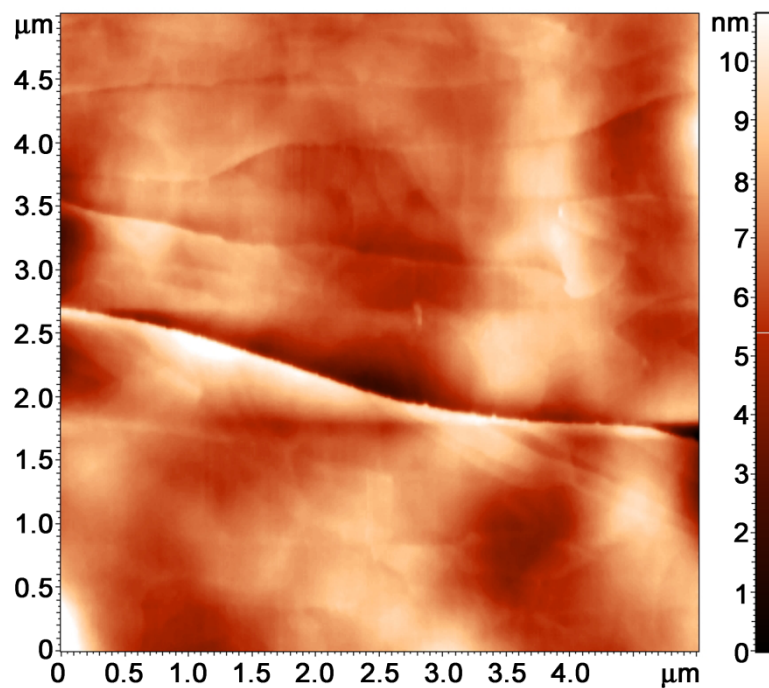

Figure 17S – AFM image of the surface of AV film saturated with vapors of nitromethane for 75 min, T=298K.

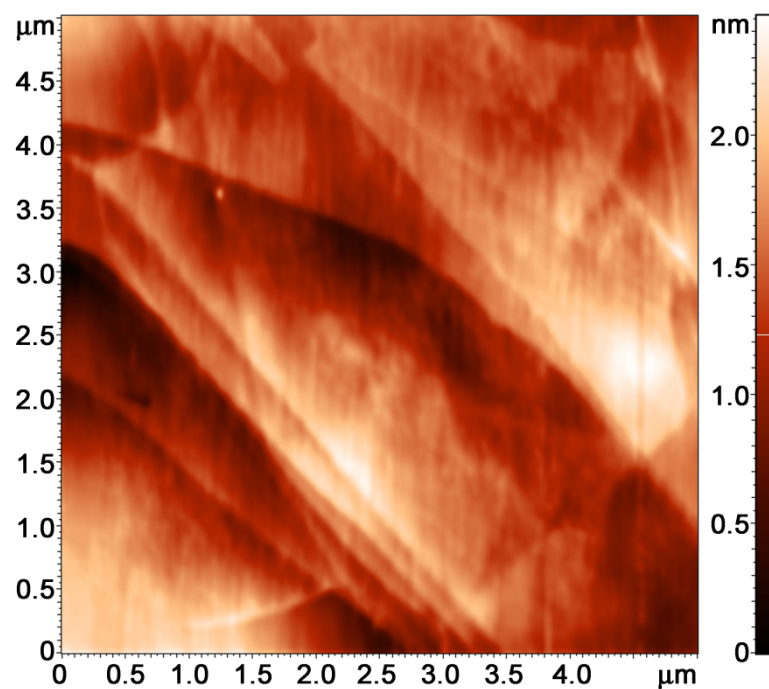

Figure 18S – AFM image of the surface of VA film saturated with vapors of water for 20 min, T=298K.

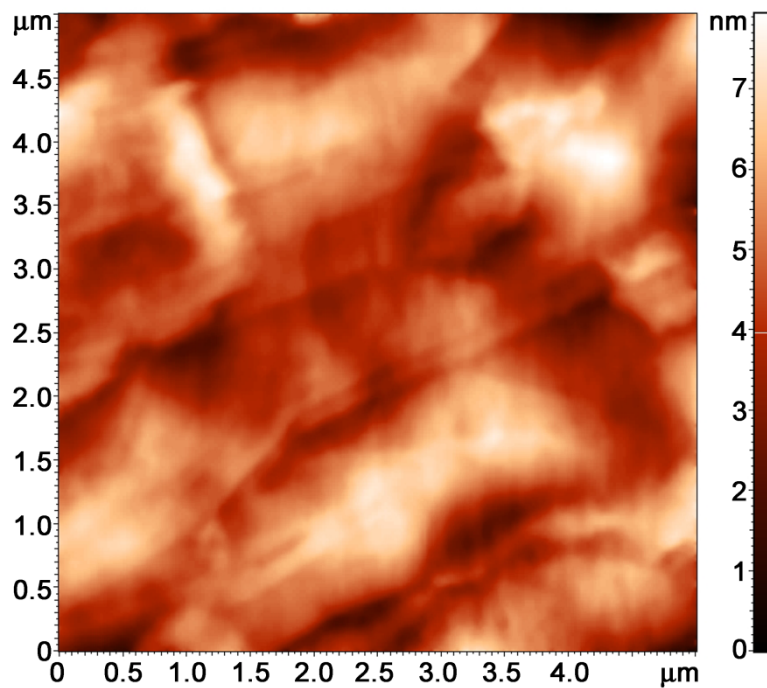

Figure 19S – AFM image of the surface of AV film saturated with vapors of *n*-hexane for 1 h, T=298K.

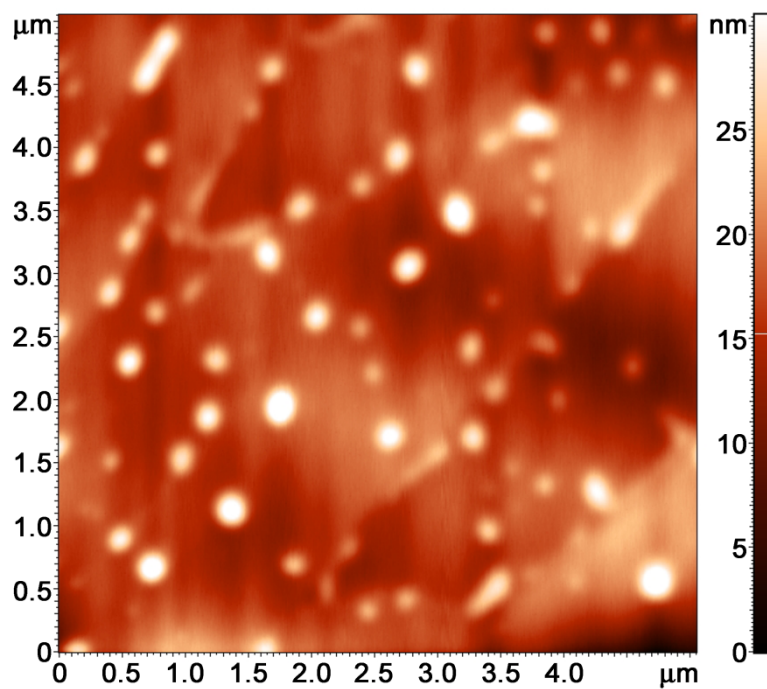

Figure 20S – AFM image of the surface of VA film saturated with vapors of *n*-hexane for 2 h, T=298K.

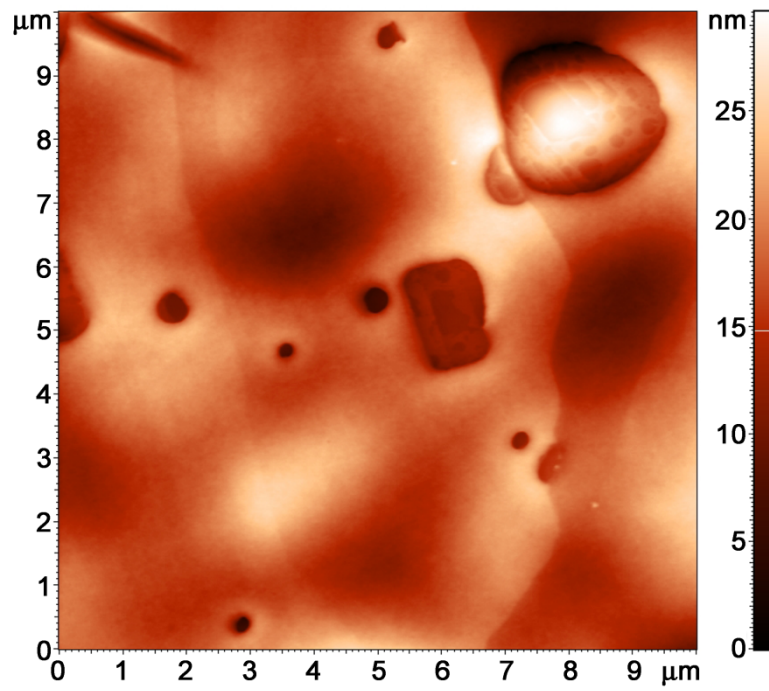

Figure 21S – AFM image of the surface of initial film of AV deposited on HOPG from a methanol solution before saturation with vapors of methylene chloride, T=298K.

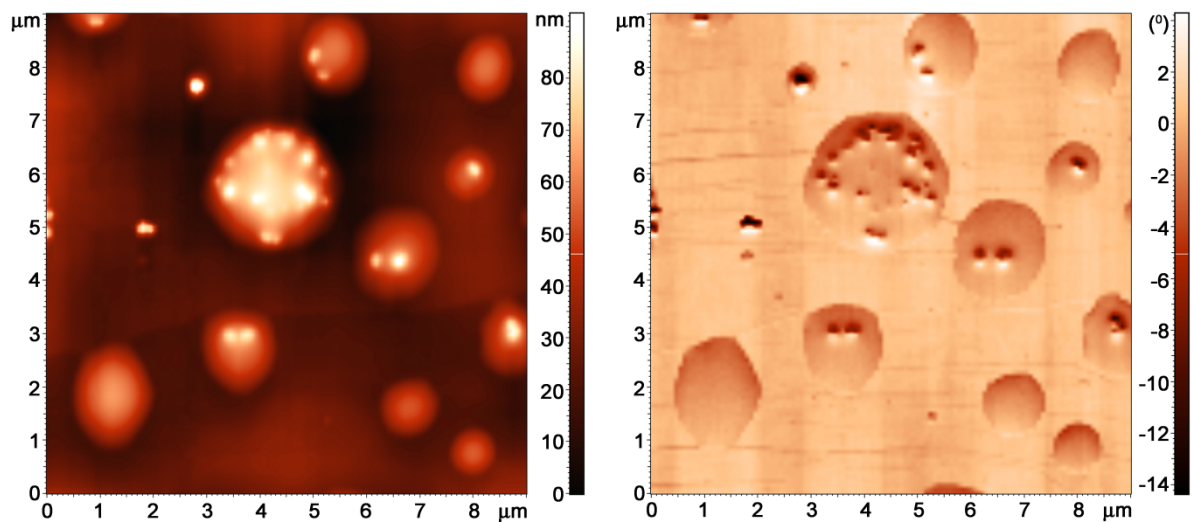

Figure 22S – AFM images of the surface of VA film saturated with vapors of methylene chloride for 75 min. Images are obtained in topography mode (left) and in phase contrast mode (right), T=298K.

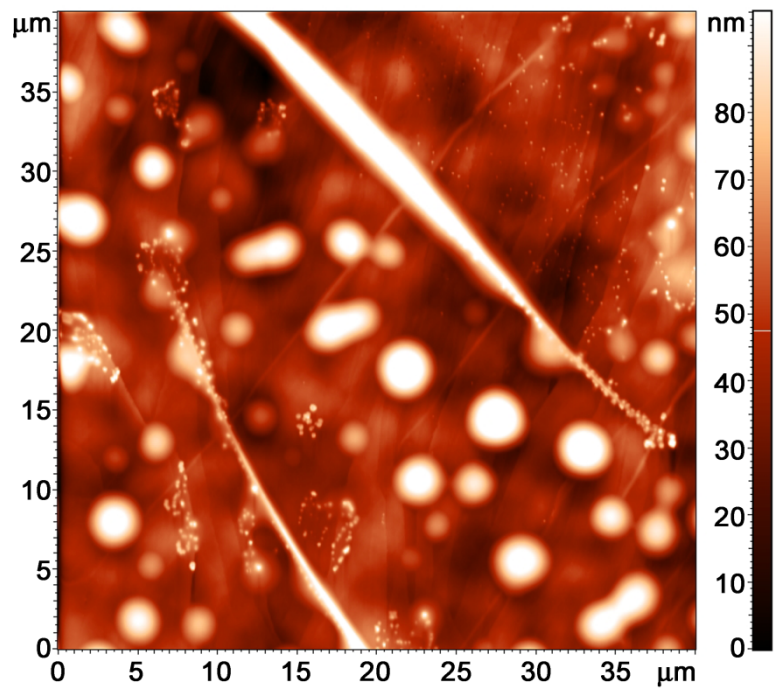

Figure 23S – AFM image of the surface of VA film saturated with vapors of chloroform for 60 min, T=298K.
